# Supplementary material for: Binding Interactions of Zinc Cationic Porphyrin with Duplex DNA: From B-DNA to Z-DNA
Source: MDPI journal article supplement (doi:10.3390/ijms19041071), 2018-04-04
Supplement: s1 [file s1]

Supplementary

## Binding Interactions of Zinc Cationic Porphyrin with Duplex DNA: From B-DNA to Z-DNA

Tingxiao Qin <sup>1,2,3</sup>, Kunhui Liu <sup>3</sup>, Di Song <sup>1,\*</sup>, Chunfan Yang <sup>3</sup>, Hongmei Zhao <sup>1</sup> and Hongmei Su <sup>3,\*</sup>

- <sup>1</sup> Beijing National Laboratory for Molecular Sciences (BNLMS), Institute of Chemistry, Chinese Academy of Sciences, Beijing 100190, China; qtx0521@iccas.ac.cn (T.Q.); hmzhao@iccas.ac.cn (H.Z.)  
<sup>2</sup> College of Chemistry, Beijing Normal University, Beijing 100875, China; kunhui@bnu.edu.cn (K.L.); yangchunfan@bnu.edu.cn (C.Y.)  
<sup>3</sup> University of Chinese Academy of Sciences, Beijing 100049, China  
\* Correspondence: songdi@iccas.ac.cn (D.S.); hongmei@bnu.edu.cn (H.S.); Tel.: +86-10-6255-2723 (D.S.)

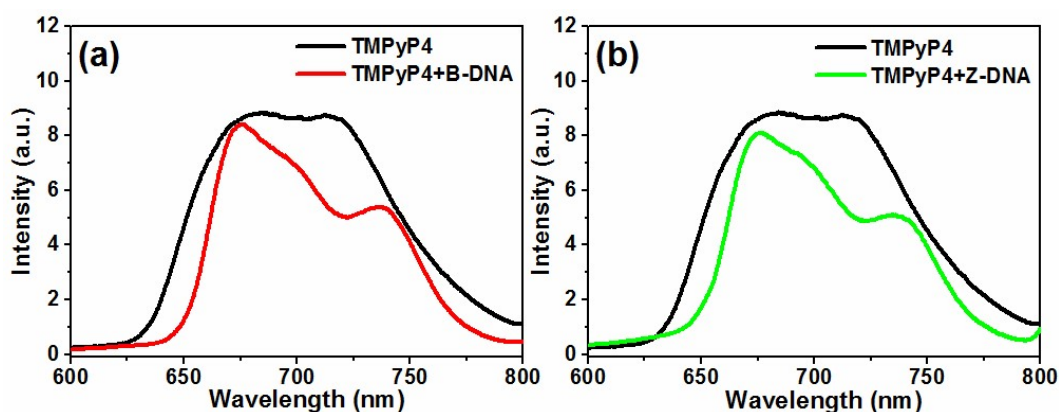

**Figure S1.** Fluorescence spectra of TMPyP4 in the absence and presence of B-DNA and Z-DNA of poly(dG–dC)<sub>2</sub> (50  $\mu$ M) in Na-cacodylate buffer (1 mM, pH = 7.0).

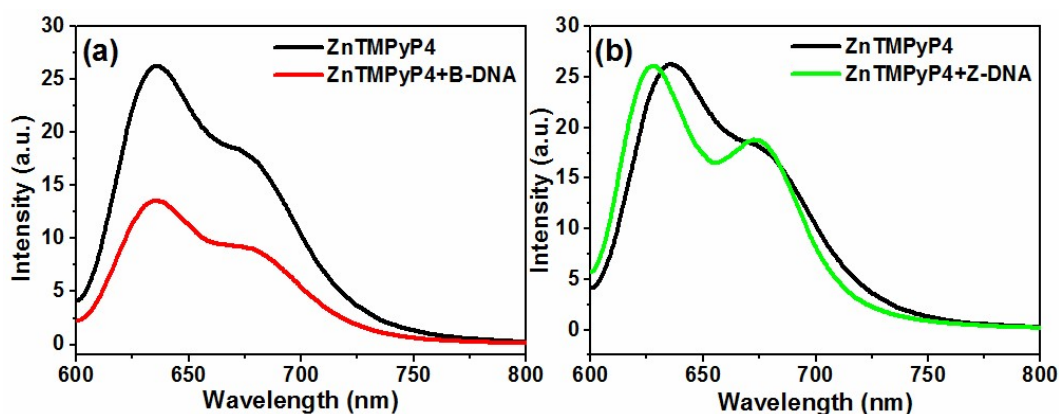

**Figure S2.** Fluorescence spectra of ZnTMPyP4 in the absence and presence of B-DNA (a) and Z-DNA (b) of poly(dG–dC)<sub>2</sub> (50  $\mu$ M) in Na-cacodylate buffer (1 mM, pH = 7.0).

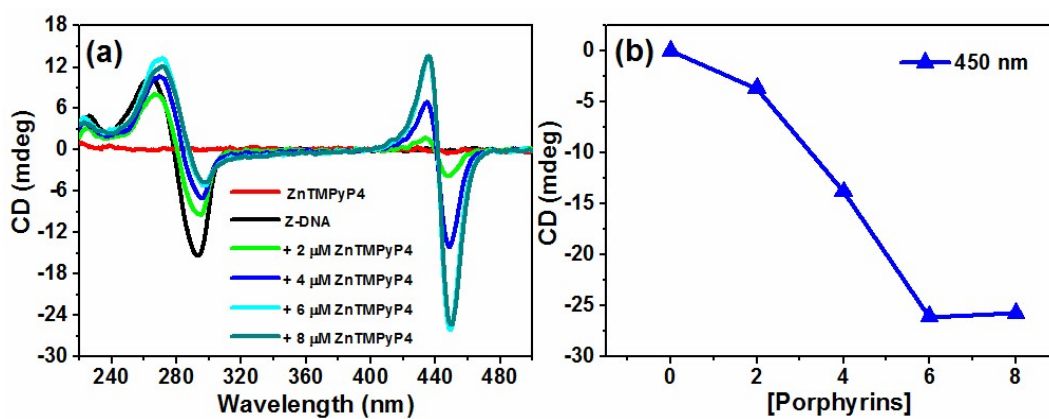

**Figure S3.** (a) Z-DNA of poly(dG–dC)<sub>2</sub> (50 μM) in the presence of different ZnTMPyP4 concentrations from 0 μM to 8 μM in Na-cacodylate buffer (1 mM, pH = 7.0). (b) CD signal as a function of porphyrin concentration at 450 nm.
